# Supplementary material for: A colorimetric sensor of H2O2based on Co3O4–montmorillonite nanocomposites with peroxidase activity
Source: Royal Society of Chemistry journal article supplement (doi:10.1039/c7nj03880a), 2017-12-15
Supplement: c7nj03880a1.pdf [file c7nj03880a1.pdf]

## Supporting information

### Colorimetric Sensor of H<sub>2</sub>O<sub>2</sub> Based on Co<sub>3</sub>O<sub>4</sub>–Montmorillonite Nanocomposites with the Peroxidase Activity

**Xixi Zhu<sup>a</sup>, Wei Chen<sup>a</sup>, Kaili Wu<sup>a</sup>, Hongyu Li<sup>a</sup>, Min Fu<sup>a</sup>, Qingyun Liu<sup>\*a</sup>, Xiao Zhang<sup>b</sup>**

*a College of Chemistry and Environmental Engineering, Shandong University of Science and Technology, Qingdao 266590, P. R. China*

*b Key Laboratory of Sensor Analysis of Tumor Marker (Ministry of Education), College of Chemistry and Molecular Engineering, Qingdao University of Science & Technology, Qingdao 266042, China*

\* Corresponding Author

E-mail: qyliu@sdust.edu.cn; qyliusdu@163.com

Tel.: +86 0532 86057757

Fax: +86 0532 80681197

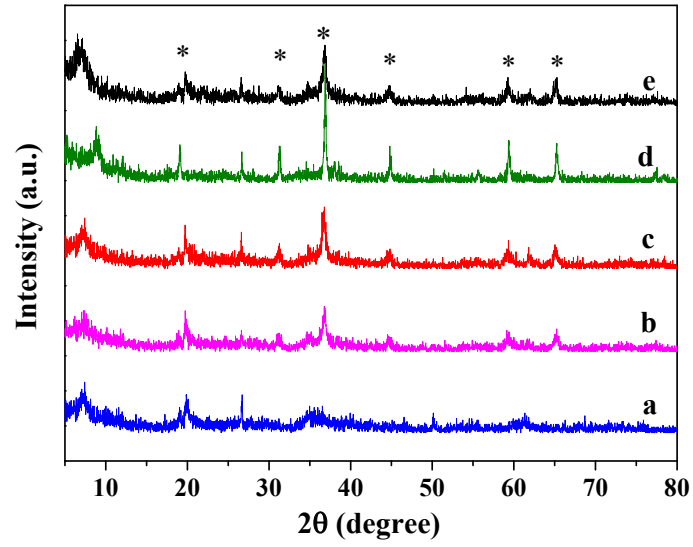

**Fig. S1** The XRD spectra of  $\text{Co}_3\text{O}_4$ -MMT nanocomposites with different reaction time, 2h (a), 4h (b), 6h (c), 8h (d), and 10h (e), respectively.

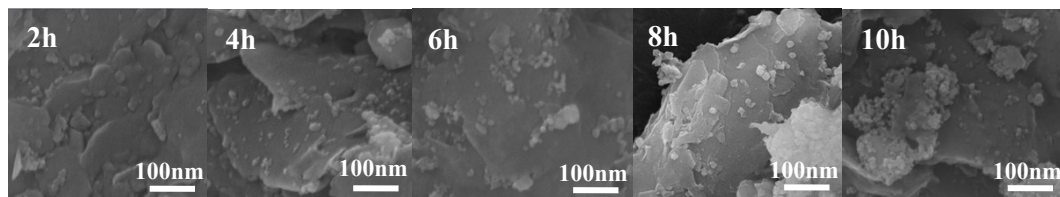

**Fig. S2** TEM images of Co<sub>3</sub>O<sub>4</sub>-MMT nanocomposites prepared for different reaction time.

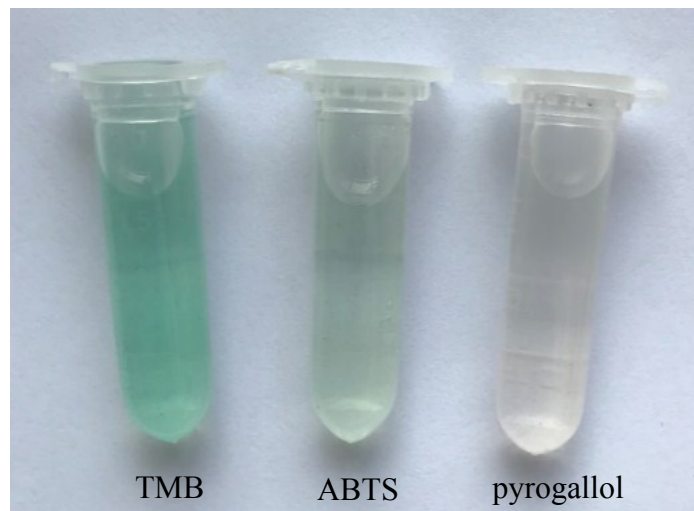

**Fig. S3** Colorimetric response to different substrates: TMB, ABTS and pyrogallol, respectively.
